# Supplementary material for: Sequential emergence and contraction of epithelial subtypes in the prenatal human choroid plexus revealed by a stem cell model
Source: Springer Nature journal article supplement (doi:10.1038/s41467-025-60361-9), 2025-06-03
Supplement: MOESM1 [file 41467_2025_60361_MOESM1_ESM.pdf]

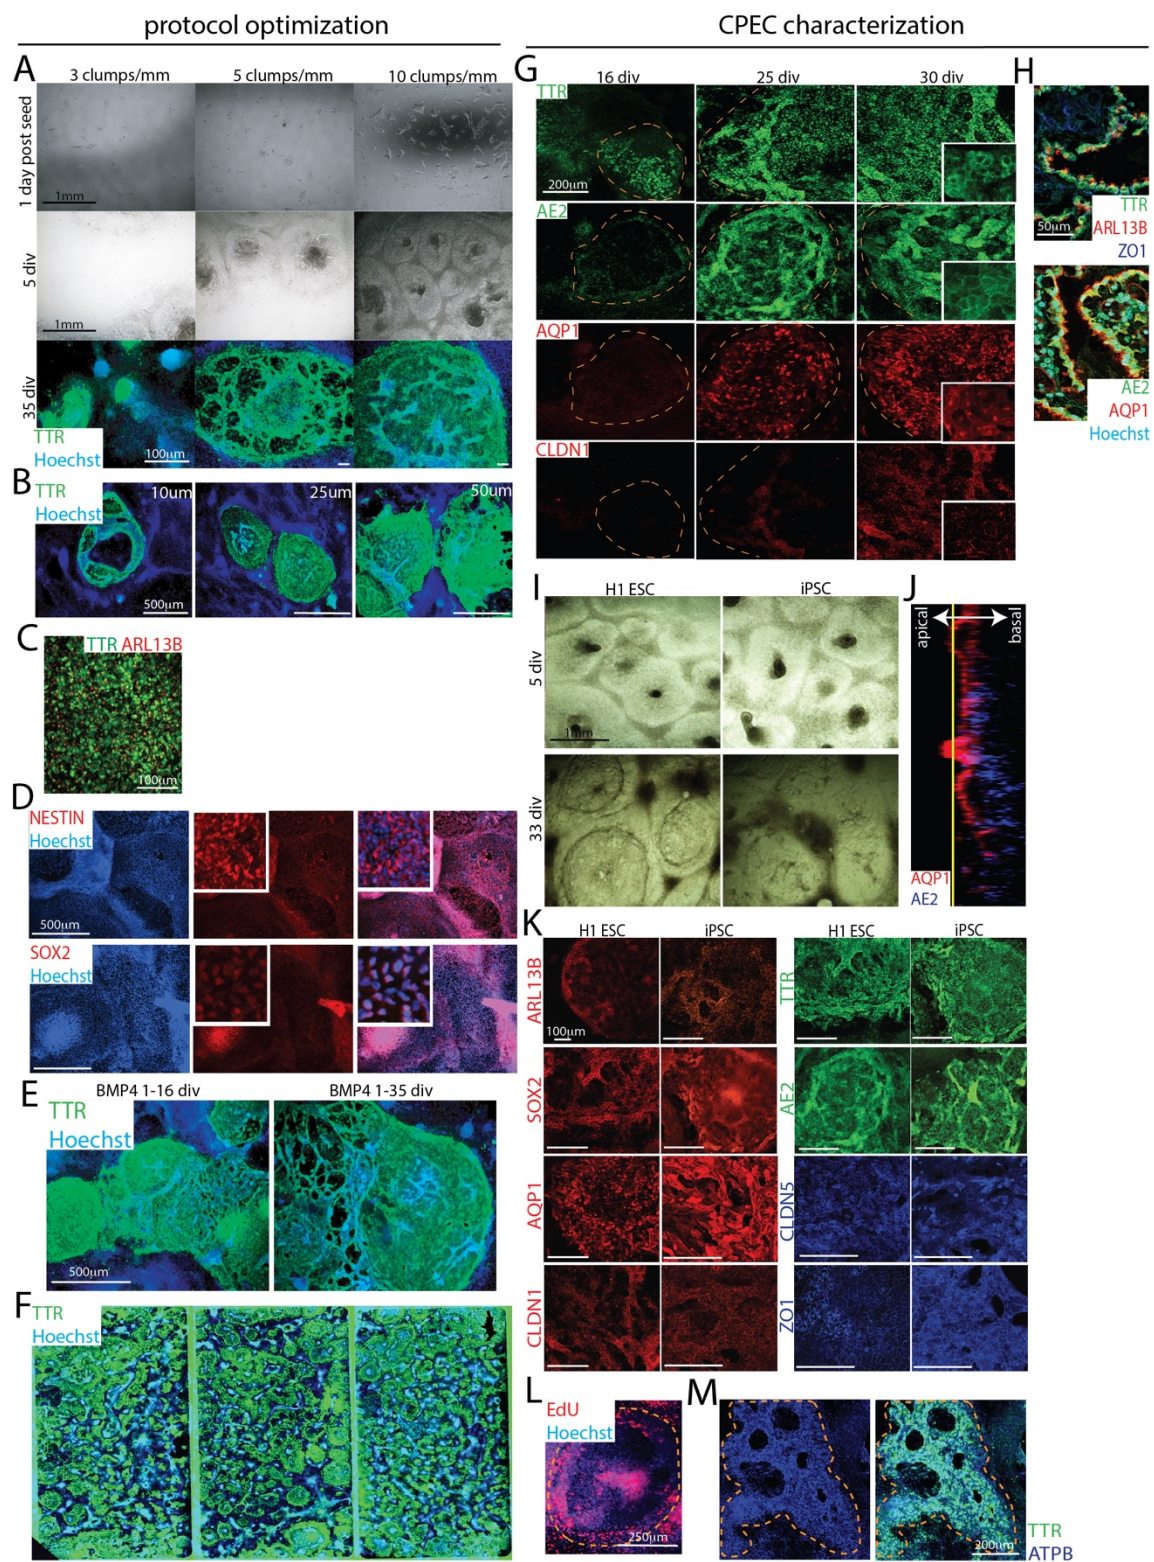

**Supplementary Figure 1: Derivation optimizations.** Dashed lines demarcate dCPEC islands. Phase contrast (A,I), confocal maximal projections (H,J,M), and epifluorescent images. **(A)** Different ESC clump seeding densities (phase and TTR ICC). 10 clumps/mm<sup>2</sup> yields more dCPEC islands than 3 or 5 clumps/mm<sup>2</sup>. **(B)** Different clump sizes at constant seeding density (TTR ICC, 35 div). Larger diameter clumps (50  $\mu$ m) yield more and larger dCPEC islands than 10 or 25  $\mu$ m clumps. **(C)** dCPEC induction using an alternative neural induction method (StemCell Technologies; TTR ICC, 35 div). **(D)** Uniform positivity for NESTIN and SOX2 after neural induction (ICC, 10 div). **(E)** BMP4 duration studies (TTR ICC, 35 div). No differences are apparent between 15- and 34-day applications. **(F)** Example of efficient and consistent dCPEC generation (TTR ICC, 35 div, stitched 4-well chamber slide). **(G)** Acquisition of dCPEC markers from 16-30 div (TTR, AE2, AQP1, and CLDN1 ICC). **(H)** Apicobasal polarity *in vivo* (39 pcw) with apical (ventricle-facing) ARL13B and AQP1, and basolateral AE2. **(I)** Similar phase-contrast appearance of H1 ESC and ADRC6 iPSC islands at key stages. **(J)** Uniform apicobasal polarity of ADRC6 iPSC-derived dCPECs (AQP1 and AE2 ICC, orthogonal view). **(K)** Similar CPEC marker expression in ESC- and ADRC6 iPSC-derived dCPECs (ICC, 35 div). **(L)** EdU application from 21-25 div leads to some EdU incorporation in 25-div dCPEC islands; see Fig. 1H for comparison (Click-iT reaction; Thermo Fisher). **(M)** Prominent mitochondrial staining in TTR+ dCPECs compared to non-dCPECs (ATPB ICC, 35 div).



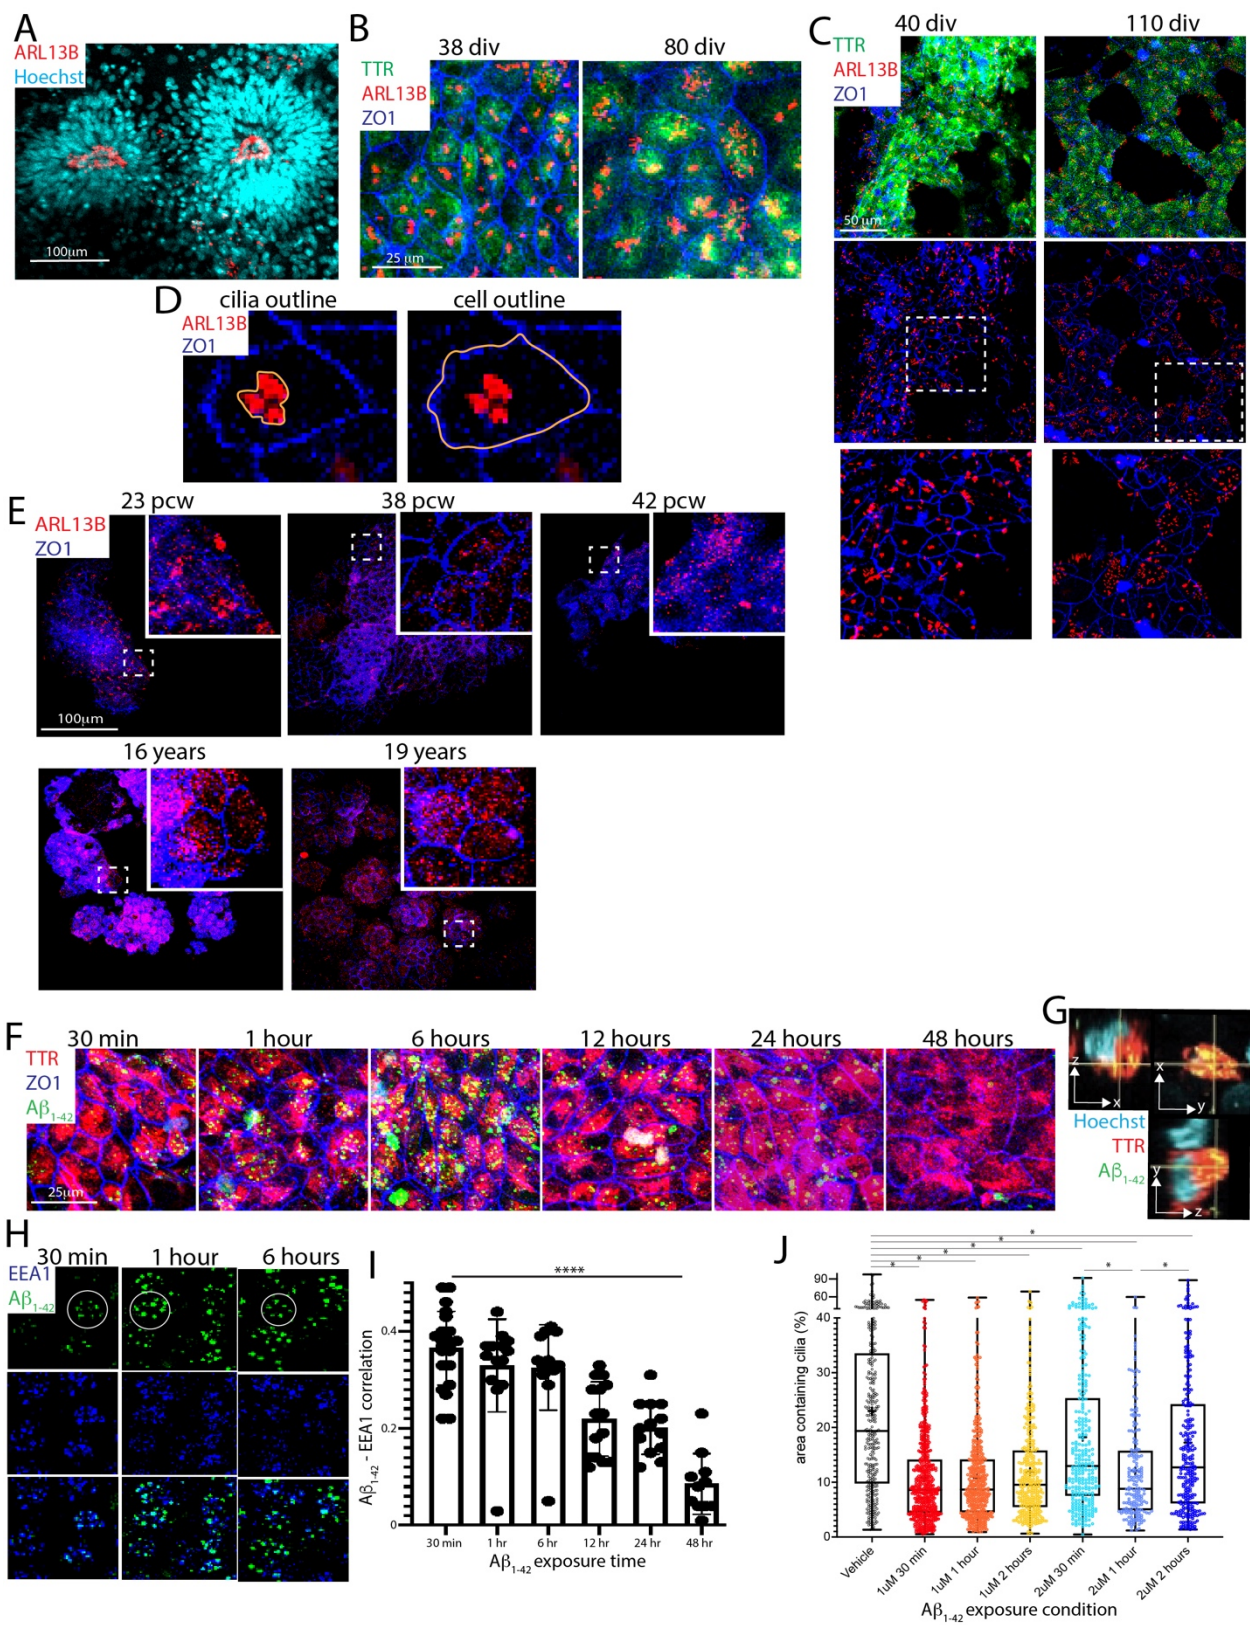

**Supplementary Figure 2: Multiciliated and A $\beta$ <sub>1-42</sub> uptake patterns in dCPECs.** All images are confocal maximal projections. **(A)** ARL13B staining of neural rosettes, which is easily distinguished from dCPEC cilia staining. **(B)** Same field as Fig. 2B, but with TTR (green) to confirm dCPEC identity. **(C)** Another example of paired cultures displaying cilia clustering early (40 div) followed by dispersion (110 div). **(D)** Outlining approach for the cilia dispersion metric (ARL13B-ZO1 ICC; see Methods). **(E)** CPEC cilia staining in a more extensive *in vivo* series. ARL13B+ cilia remain dispersed in a 16- and 19-year old. **(F)** 1 $\mu$ M A $\beta$ <sub>1-42</sub> uptake by 64-div dCPECs over a more extensive time course. **(G)** Orthogonal views displaying intracytoplasmic colocalization of A $\beta$ <sub>1-42</sub> and TTR (64 div). **(H)** A $\beta$ <sub>1-42</sub> in EEA1+ early endosomes (64 div). Circular A $\beta$ <sub>1-42</sub> uptake patterns are apparent (circles). **(I)** Bar graph with data points (means  $\pm$  s.d.) showing decreased A $\beta$ <sub>1-42</sub>-EEA1 colocalization over time (one-way ANOVA  $p < 0.0001^{****}$ ;  $n = 12$  ROIs per timepoint). **(J)** Box plots (medians, means “+”, quartiles and ranges) of cilia clustering induced by 1 $\mu$ M or 2 $\mu$ M A $\beta$ <sub>1-42</sub> in 64-div dCPECs (ARL13B-ZO1 ICC). All A $\beta$ -treated cultures had dCPECs with more clustered cilia than controls by one hour (one-way ANOVA  $p < 0.0001$ , Bonferroni corrected t-tests  $p < 0.05^*$ ; vehicle  $n = 352$ , 1 $\mu$ M 30min  $n = 531$ , 1 $\mu$ M 1hr  $n = 476$ , 1 $\mu$ M 2hr  $n = 354$ , 2 $\mu$ M 30min  $n = 294$ , 2 $\mu$ M 1hr  $n = 184$ , 2 $\mu$ M 2hr  $n = 267$ ). Source data provided as a Source Data file. See statistical section of Methods for details.

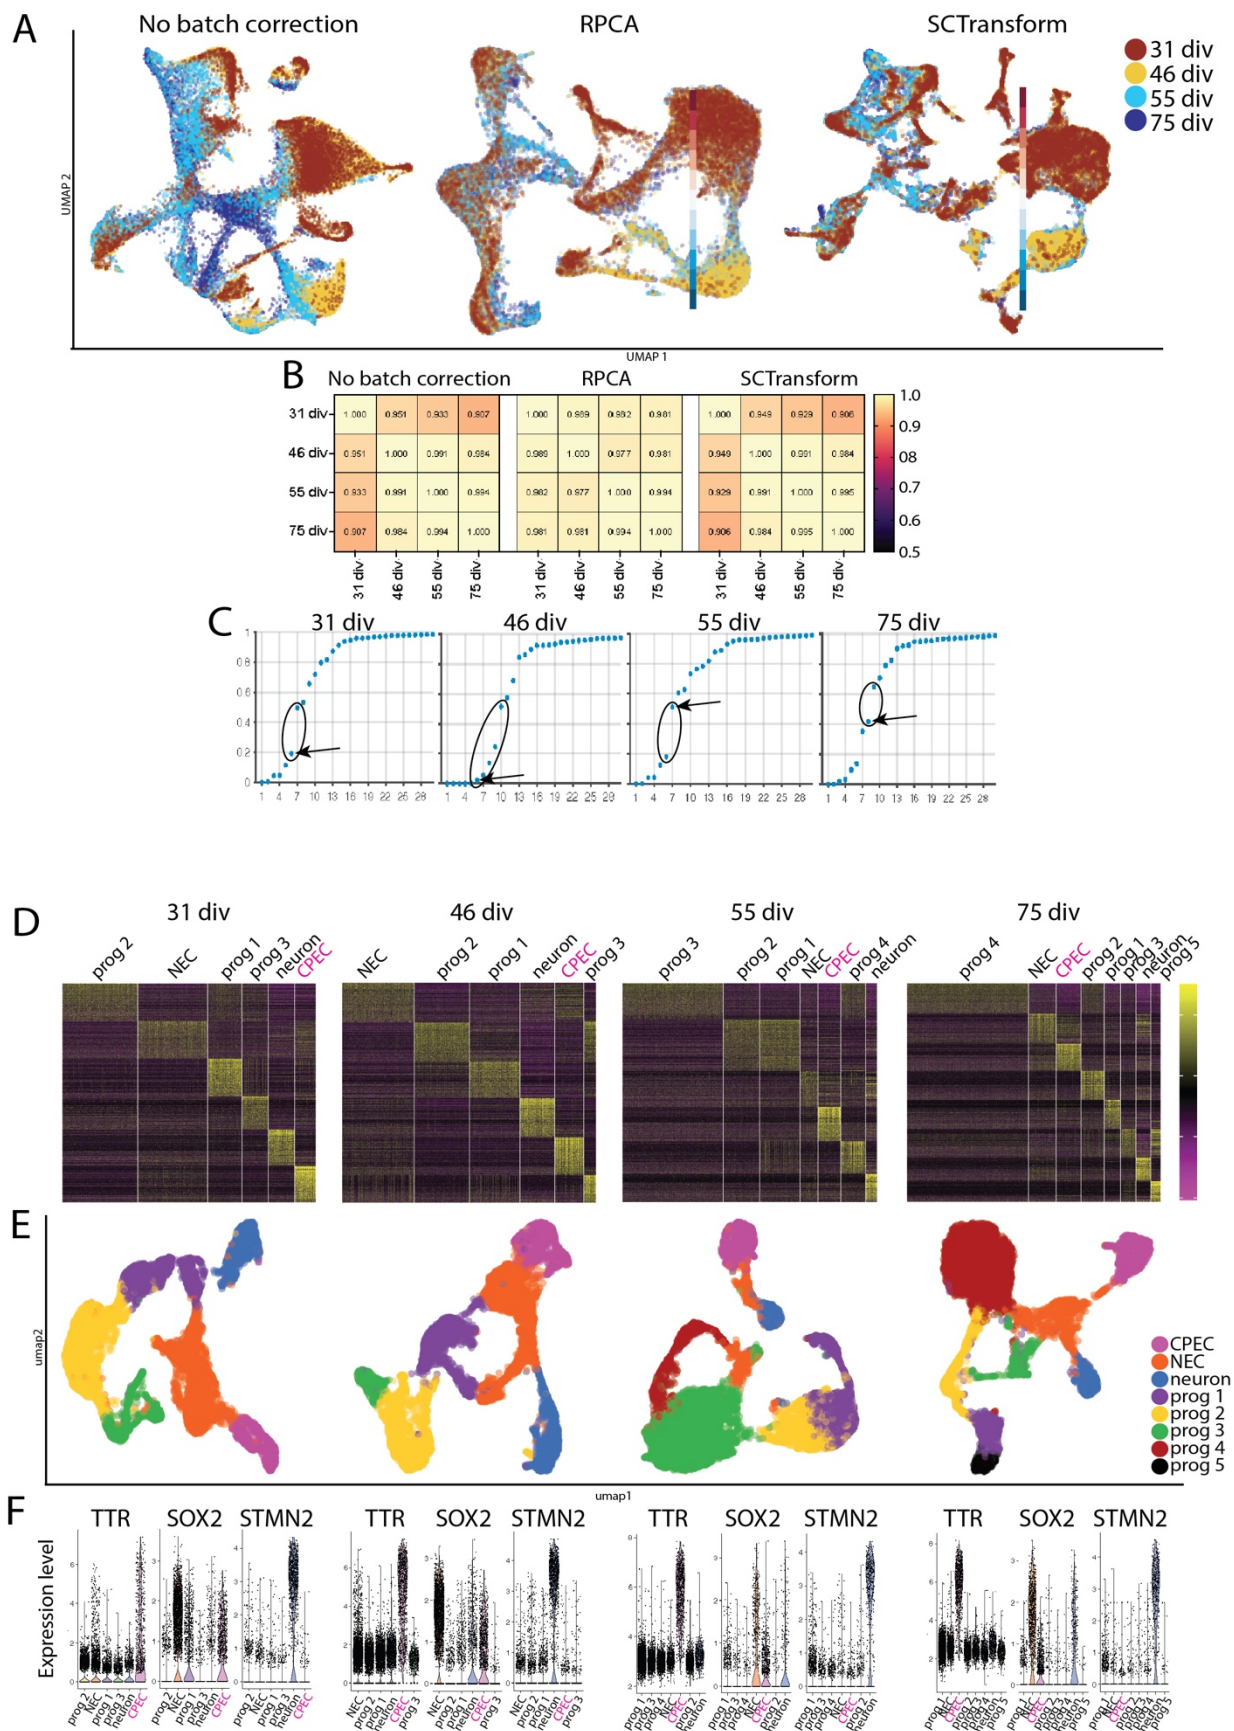

### **Supplementary Figure 3: SoptSC quality controls and cluster number determinations**

**(A-C) and Seurat analyses (D-F).** **(A)** UMAPs of aggregated scRNA-seq data, color coded by timepoint, without and with RPCA or SCTransform batch correction. Clustering is discrete and spans timepoints in all cases. **(B)** Pearson correlations for dCPECs across timepoints, without and with RPCA or SCTransform batch correction. Correlations are generally high. Non-corrected and SCTransform-corrected correlations display perfect temporal ordering. Color scale reflects  $r$  values 0-1. **(C)** SoptSC cluster number determinations by Eigengap heuristic; ranges of bioinformatically-supported clusters are circled. Lowest cluster numbers were selected (arrows), except for 55 div, which yielded excellent DEG heatmaps using the higher number, as in D. **(D)** Heatmaps of top-100 DEGs support Eigengap heuristic-based cluster numbers. Color scale of Z-score of DEGs. **(E)** Seurat UMAPs supporting SoptSC-determined cluster numbers and the direct origin of dCPECs (purple) from NECs (orange). **(F)** Violin plots of cell-type marker gene expression using Seurat-generated clusters. TTR highlights dCPECs, SOX2 highlights NECs, and STMN2 highlights neurons.



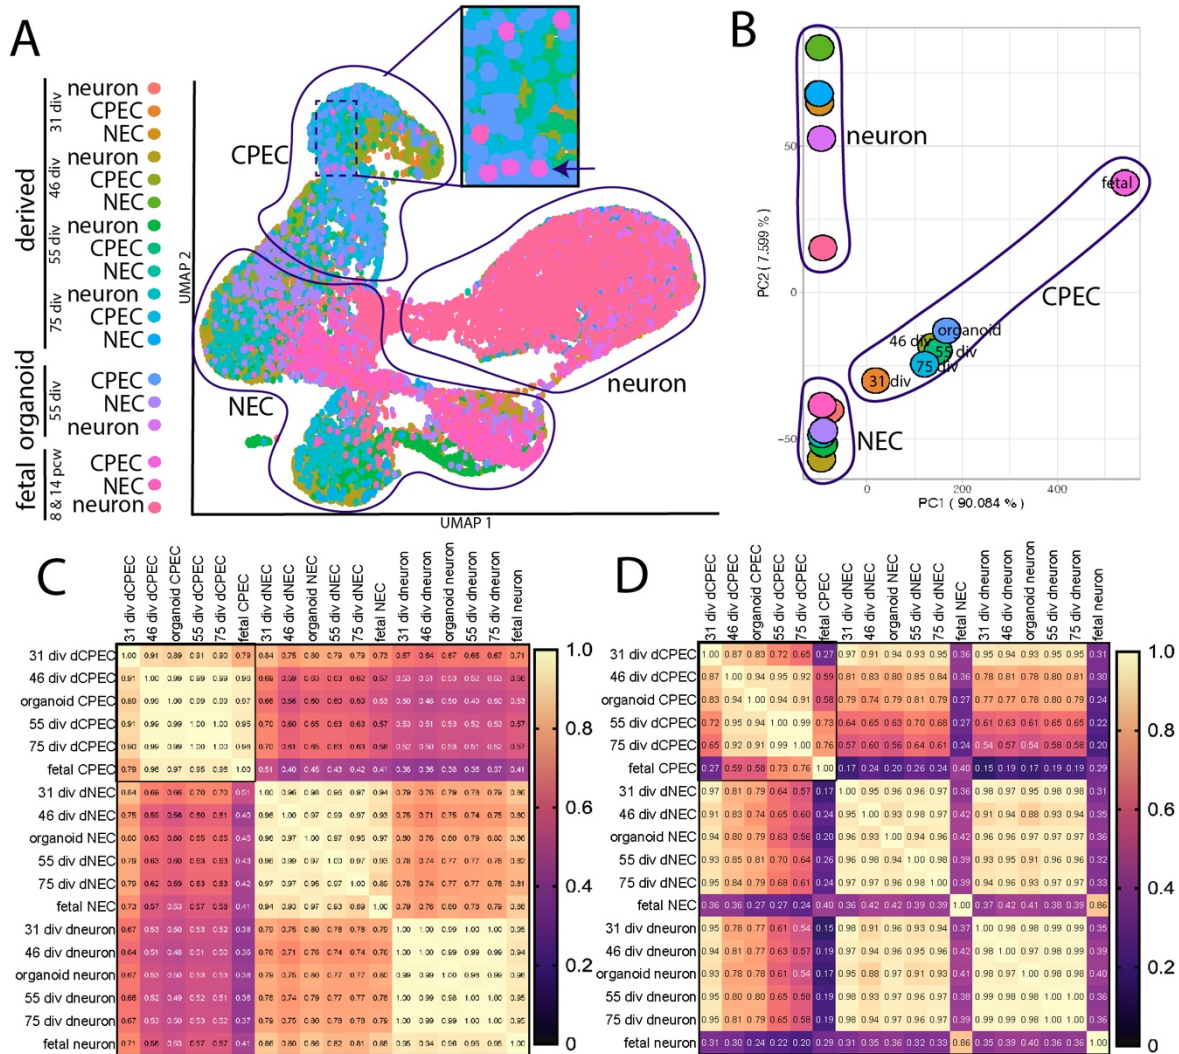

**Supplementary Figure 4: Additional dCPEC, organoid CPEC, and fetal CPEC comparisons.** **(A)** RPCA-corrected UMAP of aggregated datasets. CPECs, NECs, and neurons from each dataset cluster well (outlined). Within the CPEC cluster, fetal CPECs (pink, arrow in inset) are more similar to older dCPECs (green-blue). **(B)** RPCA-corrected PCA of aggregated datasets, with CPECs, NECs, and neurons outlined. **(C)** RPCA-corrected Pearson correlation table for CPECs (boxed upper left), NECs, and neurons (lower right). Correlations between CPECs from the three datasets are high, as they are for NECs and neurons. **(D)** SCTransform-corrected Pearson correlation table, organized as in C. Correlations among the CPECs are generally lower, while NECs and neurons appear more similar. Color scale reflects  $r$  values 0-1.



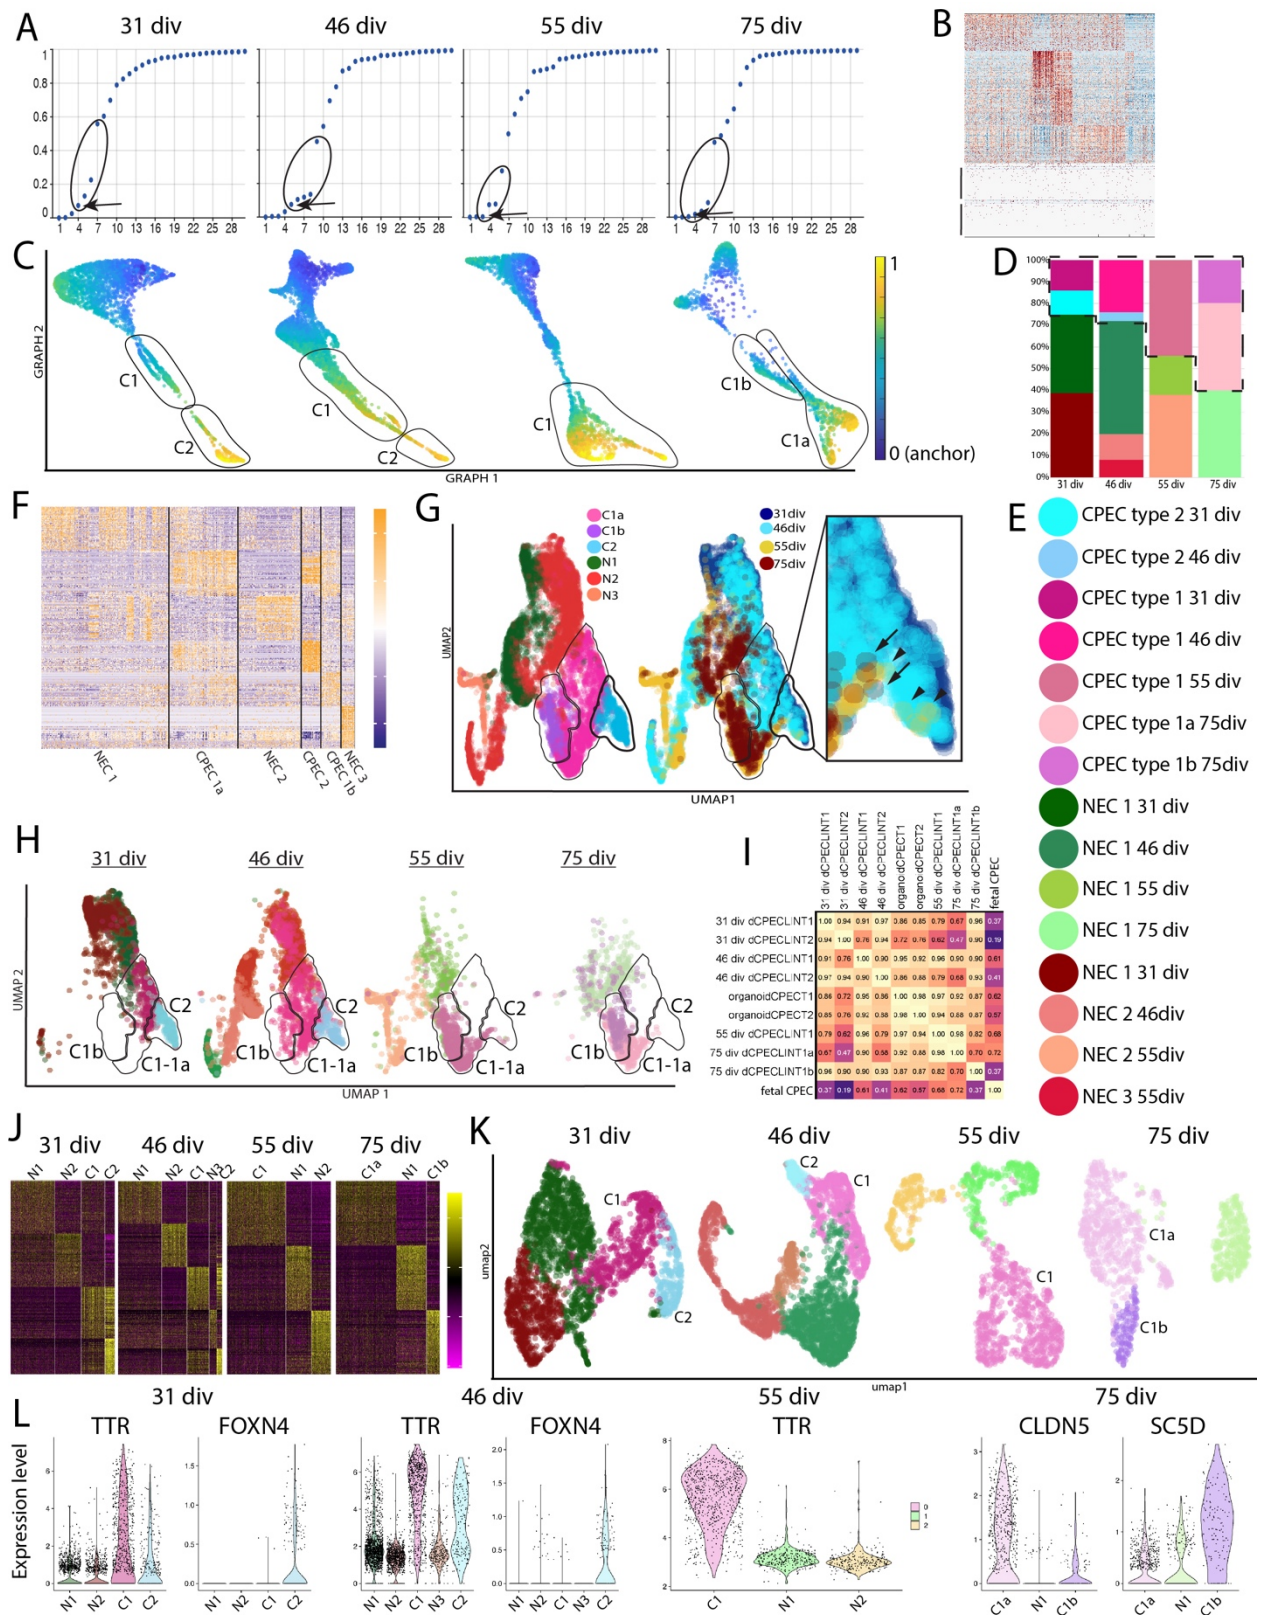

**Supplementary Figure 5: Additional SoptSC (A-I) and Seurat analyses (J-L) of dCPEC subtypes.** **(A)** Eigengap heuristic for aggregated dCPECs and NECs. Ranges of bioinformatically-supported clusters are circled. The lowest cluster numbers were selected (arrows). **(B)** DEG heatmap example of overclustering. A 31-div heatmap for 6 clusters includes two without distinctive signatures (lower rows) and supporting 4 as the more appropriate choice. **(C)** Pseudotemporal color coding of SoptSC GRAPH charts shown in Fig. 4B, with NECs as anchor. NECs are more similar to C1 than C2 cells at 31 and 46 div. Both C1a and C1b cells have similarities to NECs. **(D-E)** Stacked bar graphs of dCPEC and NEC subtypes, with color coding in E. Total dCPEC and C1 fractions increase over time compared to NECs. **(F)** Heatmap of top-100 dCPEC and NEC DEGs aggregated across timepoints, which suggests 3 dCPEC and 3 NEC clusters like the individual timepoint analyses in Fig. 4A. Color scale of Z-score of DEGs. **(G)** UMAPs of aggregated dCPECs and NECs, color coded by subtype (left) or timepoint (right), with dCPEC subtype regions outlined. Some C2 cells at 55 div (arrowheads) and 75 div (arrows) are detected. **(H)** UMAPs per timepoint, as in Fig. 4E, plus NEC subtypes. Similar dCPEC patterns are seen, including C1 lineage adoption of a hybrid C1a-C1b profile at 55 div before bifurcating by 75 div. **(I)** SCTransform-corrected Pearson correlations for organoid CPECs, fetal CPECs, and dCPECs separated by subtype and timepoint. 75-div C1a dCPECs are more similar than C1b cells to 55-div C1 dCPECs. **(J)** Seurat heatmaps of top-100 DEGs, supporting dCPEC and NEC cluster numbers and designations based on SoptSC. Color scale of Z-score of DEGs. **(K)** Seurat UMAPs supporting dCPEC and NEC cluster numbers and designations based on SoptSC. **(L)** Violin plots of dCPEC subtype marker expression in Seurat-generated clusters.

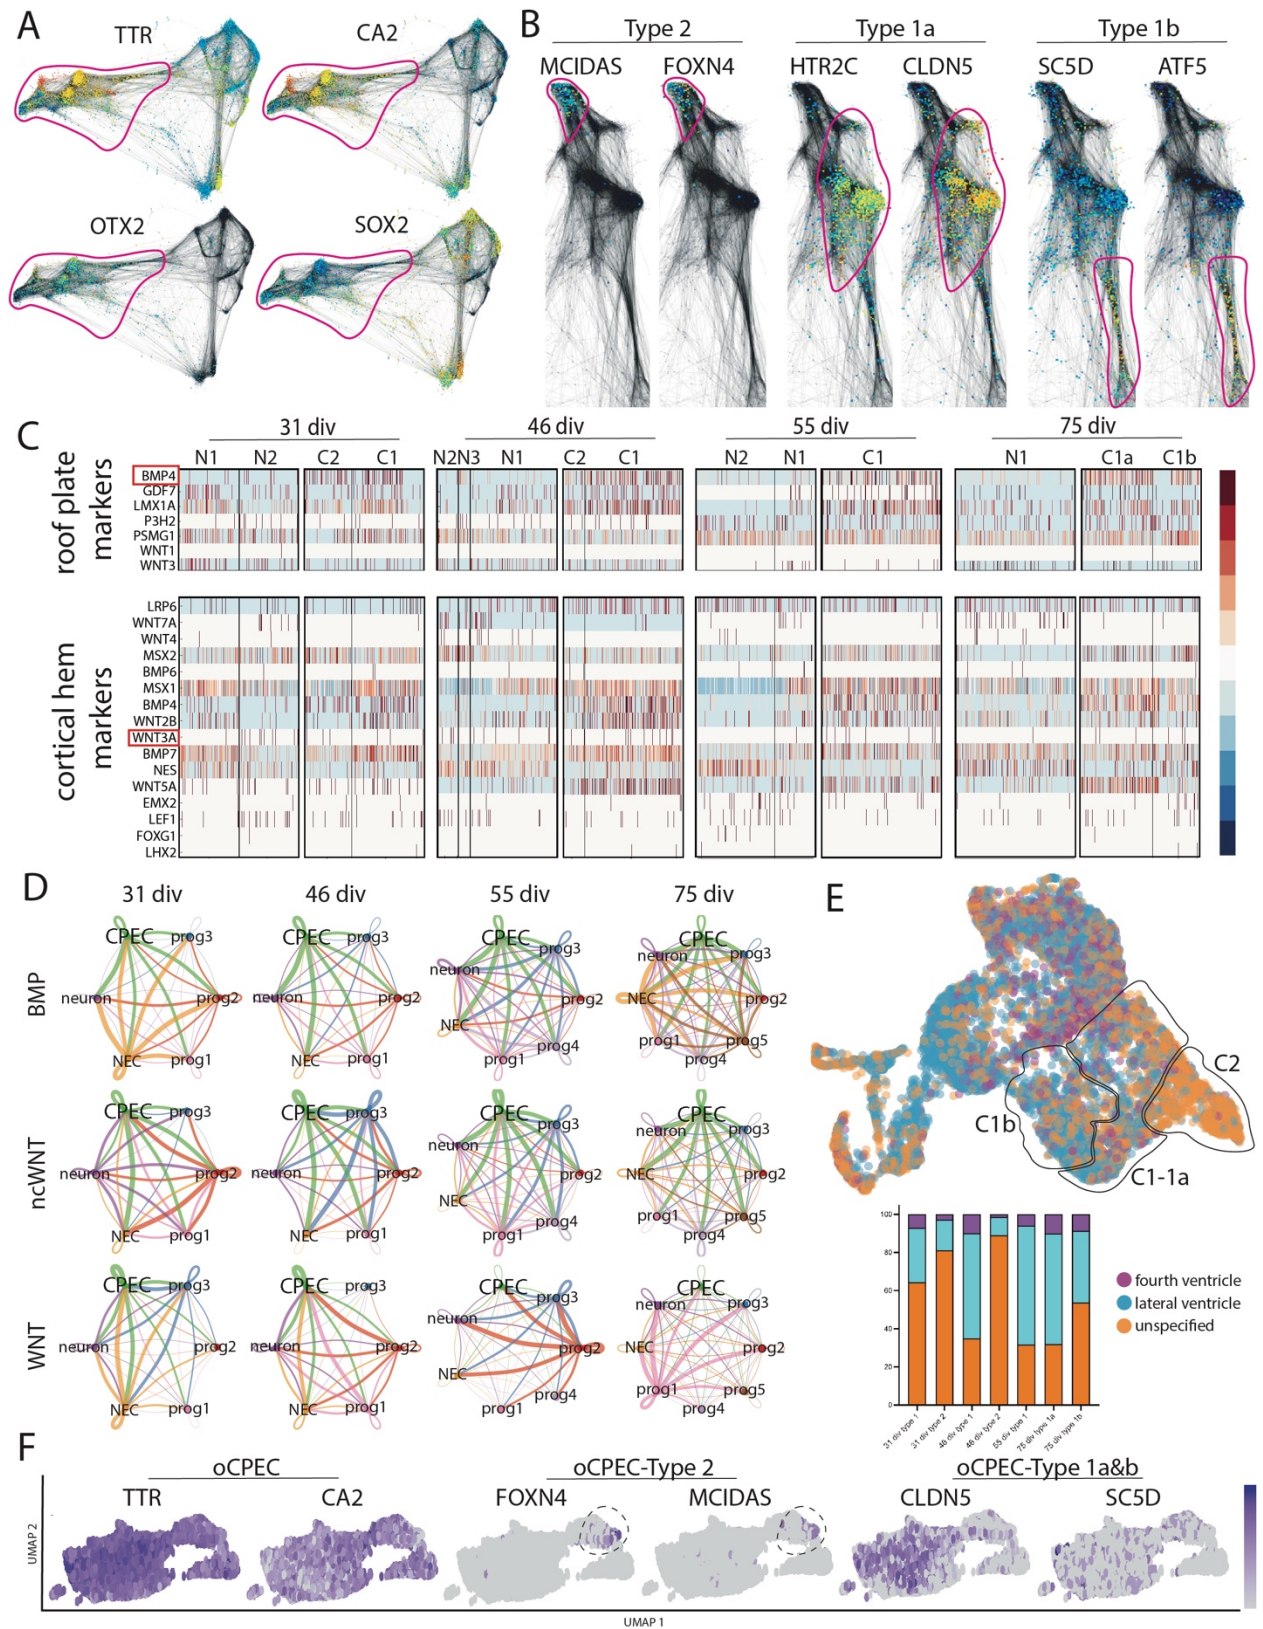

**Supplementary Figure 6: Additional bioinformatic analyses, including STITCH and CellChat.** **(A)** STITCH dot plots of aggregated dCPECs and NECs, as in Fig. 4F-H, highlighting CPEC (TTR, CA2, OTX2) and NEC markers (SOX2); dCPEC regions outlined. **(B)** STITCH dot plots of aggregated dCPECs, highlighting type 2 (MCIDAS, FOXN4), type 1a (HTR2C, CLDN5), and type 1b markers (SC5D, ATF5); subtype regions outlined. **(C)** Heatmap of roof plate (top) and cortical hem (bottom) markers per timepoint. Patterns suggestive of unique relationships to dCPECs or dCPEC subtypes are not seen. Among BMPs, BMP4 and BMP7 are expressed by dCPECs, while WNT2B and WNT5A are expressed among WNTs. Color scale of Z-score of DEGs. **(D)** CellChat analyses of major cell types for BMP, non-canonical WNT (ncWNT), and WNT signaling per timepoint. Predicted autocrine dCPEC signaling (green loops) and dCPEC signaling to other cell types (green curves) are prominent. **(E)** Ventricular (regional) specification of aggregated dCPECs and NECs using mouse genes<sup>11</sup>. Lateral (blue) exceeds 4th ventricular identities (purple), but identities are mixed, include substantial unspecified fractions, and do not distinguish dCPEC subtypes. **(F)** Organoid CPEC<sup>13</sup> (oCPEC) expression of dCPEC subtype markers. Organoid CPECs express pan-CPEC markers (left) and include a C2 subpopulation (circled in middle), but C1a (CLDN5<sup>hi</sup>SC5D<sup>lo</sup>) and C1b (SC5D<sup>hi</sup>CLDN5<sup>lo</sup>) subpopulations are not distinguished. Color scale reflects the log normalized expression levels of the markers where white is zero and the dark purple reflects the highest expression level for each of the markers. Source data provided as a Source Data file.



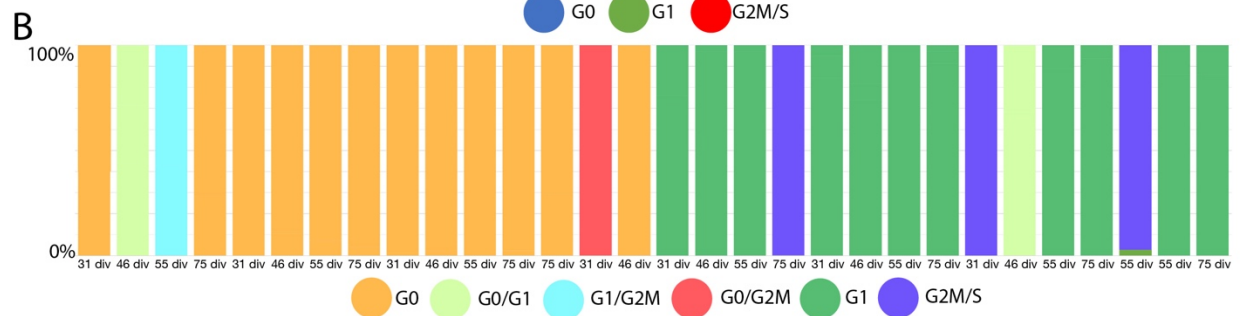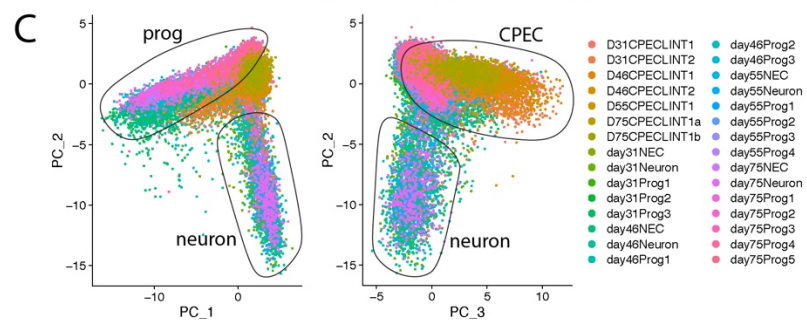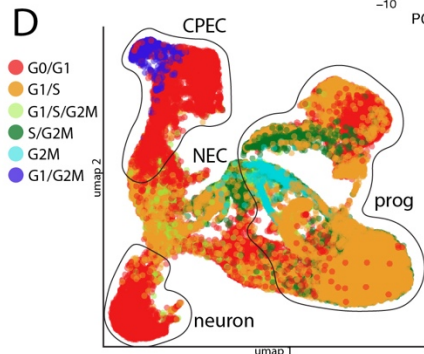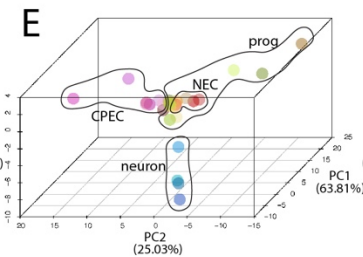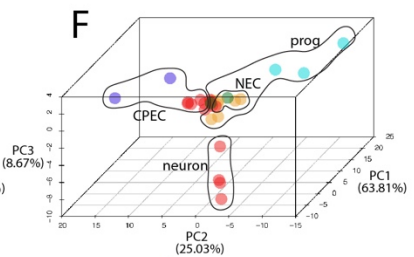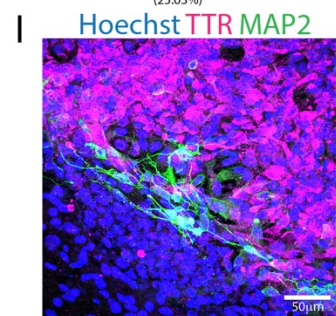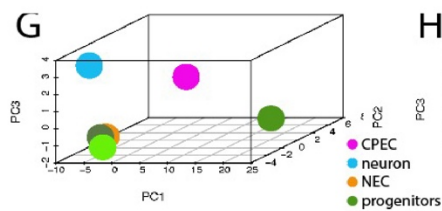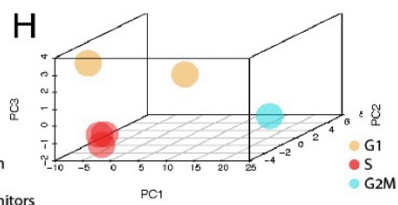

**Supplementary Figure 7: Additional cell cycle analyses using ‘neural G0’ (A-C) and Seurat (D-H).** **(A)** Stacked bar graphs color coded by neural G0 phase (G0, G1, G2M/S). In contrast to NECs and progenitors, dCPEC subtypes have predominant G0 signatures (blue) and lower G1 fractions (green) than the neurons. 75-div C1b cells are also G0-predominant, but have a higher G1 fraction than other dCPEC subtypes. Some C2 cells have a G2M/S signature (red) due to shared ciliogenesis and M-phase genes. **(B)** Color coding for subtype clusters used in Fig. 5D. Clusters are assigned to their predominant phase unless a second phase exceeds 30%, in which case a cluster is designated and color coded for “dual” phases. **(C)** 2D PCA scatterplots using neural G0 genes. The second PC distinguishes the neurons (left) while the third PC distinguishes the dCPECs (right). **(D)** UMAP as in Fig. 5, but using Seurat cell cycle genes (mouse), color coded for cell cycle phase. The dCPECs and neurons have predominant G0/G1 signatures (red). G1/G2M C2 cells are also evident (blue). **(E-F)** 3D PCA plot of subtype clusters using Seurat cell cycle genes, color coded for subtype or cell cycle phase as in C or D, respectively. The three branches of NEC progeny are evident. **(G-H)** 3D PCA plot of 31-div cell-type clusters using Seurat cell cycle genes, color coded for cell type (G) or cell cycle phase (H). G0/G1 dCPEC and neuron clusters are distinct. **(I)** The same field as in Fig. 5G, without KI67 and with Hoechst, to enable non-dCPEC estimates outside the dCPEC island.

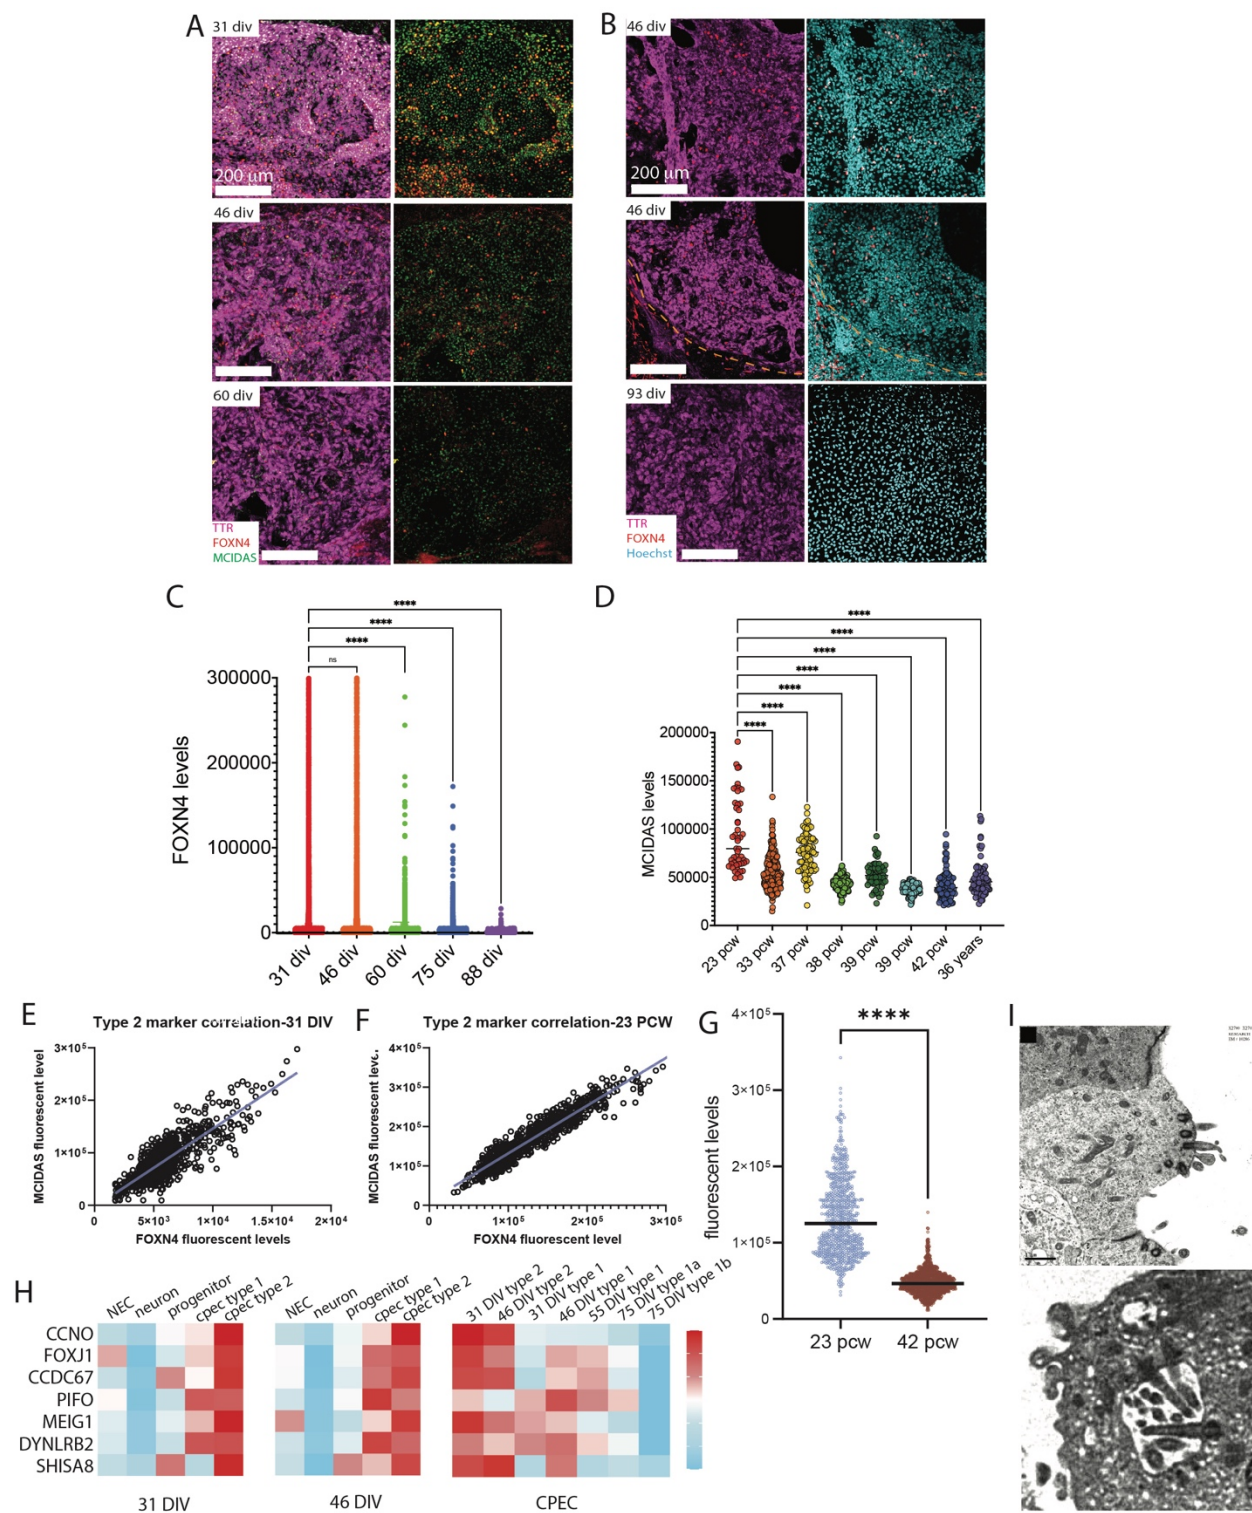

**Supplementary Figure 8: Additional studies on early type 1 and type 2 dCPECs.** All images are confocal maximal projections. **(A)** Type 2 dCPECs in parallel cultures (FOXN4-MCIDAS-TTR ICC; 31, 46, and 60 div). FOXN4 (red) and MCIDAS (green) fractional positivities and expression levels decrease over time. **(B)** Lower-power views of the FOXN4 studies shown in Fig. 6F (FOXN4-TTR ICC; 46 and 93 div), dashed lines demarcate dCPEC islands. In addition to the decreasing FOXN4+ C2 fraction, a TTR-negative non-dCPEC population stains for FOXN4 (middle panel). **(C)** Expanded *in vitro* series of parallel cultures (31-88 div) demonstrating type 2 contraction over time (FOXN4 ICC). **(D)** Expanded *in vivo* series of choroid plexus tissues (23 pcw-36 years) demonstrating type 2 contraction after midgestation (23 pcw) (MCIDAS IHC). **(E)** Positive linear Pearson correlation of FOXN4 and MCIDAS fluorescence levels in 31-div dCPECs ( $r=0.8308$ ,  $p<0.0001$ ;  $n=1003$ ). **(F)** Positive linear Pearson correlation of FOXN4 and MCIDAS fluorescence levels in 23 pcw ChP tissue ( $r=0.9486$ ,  $p<0.0001$ ;  $n=799$ ). **(G)** Violin plots with medians of FOXN4 fluorescence levels in CPECs *in vivo*, which decrease between 23 and 42 pcw (t-test  $p<0.0001^{****}$ ; 23-pcw  $n=799$ , 42-pcw  $n=1504$ ). **(H)** Heatmap of C2 markers, including master ciliogenesis genes CCNO and FOXJ1. Compensation for the reductions in ciliogenic cells and gene enrichment is not evident at later *in vitro* stages. Color scale of Z-score of DEGs. **(I)** Transmission electron micrographs at 40 div demonstrating dCPECs with multiple basal bodies (upper image) and a ciliary pocket with multiple cilia (lower image). Note also the 'dark' dCPEC immediately adjacent to the 'light' dCPEC with multiple basal bodies (upper image). Source data provided as a Source Data file. See statistical section of Methods for details.



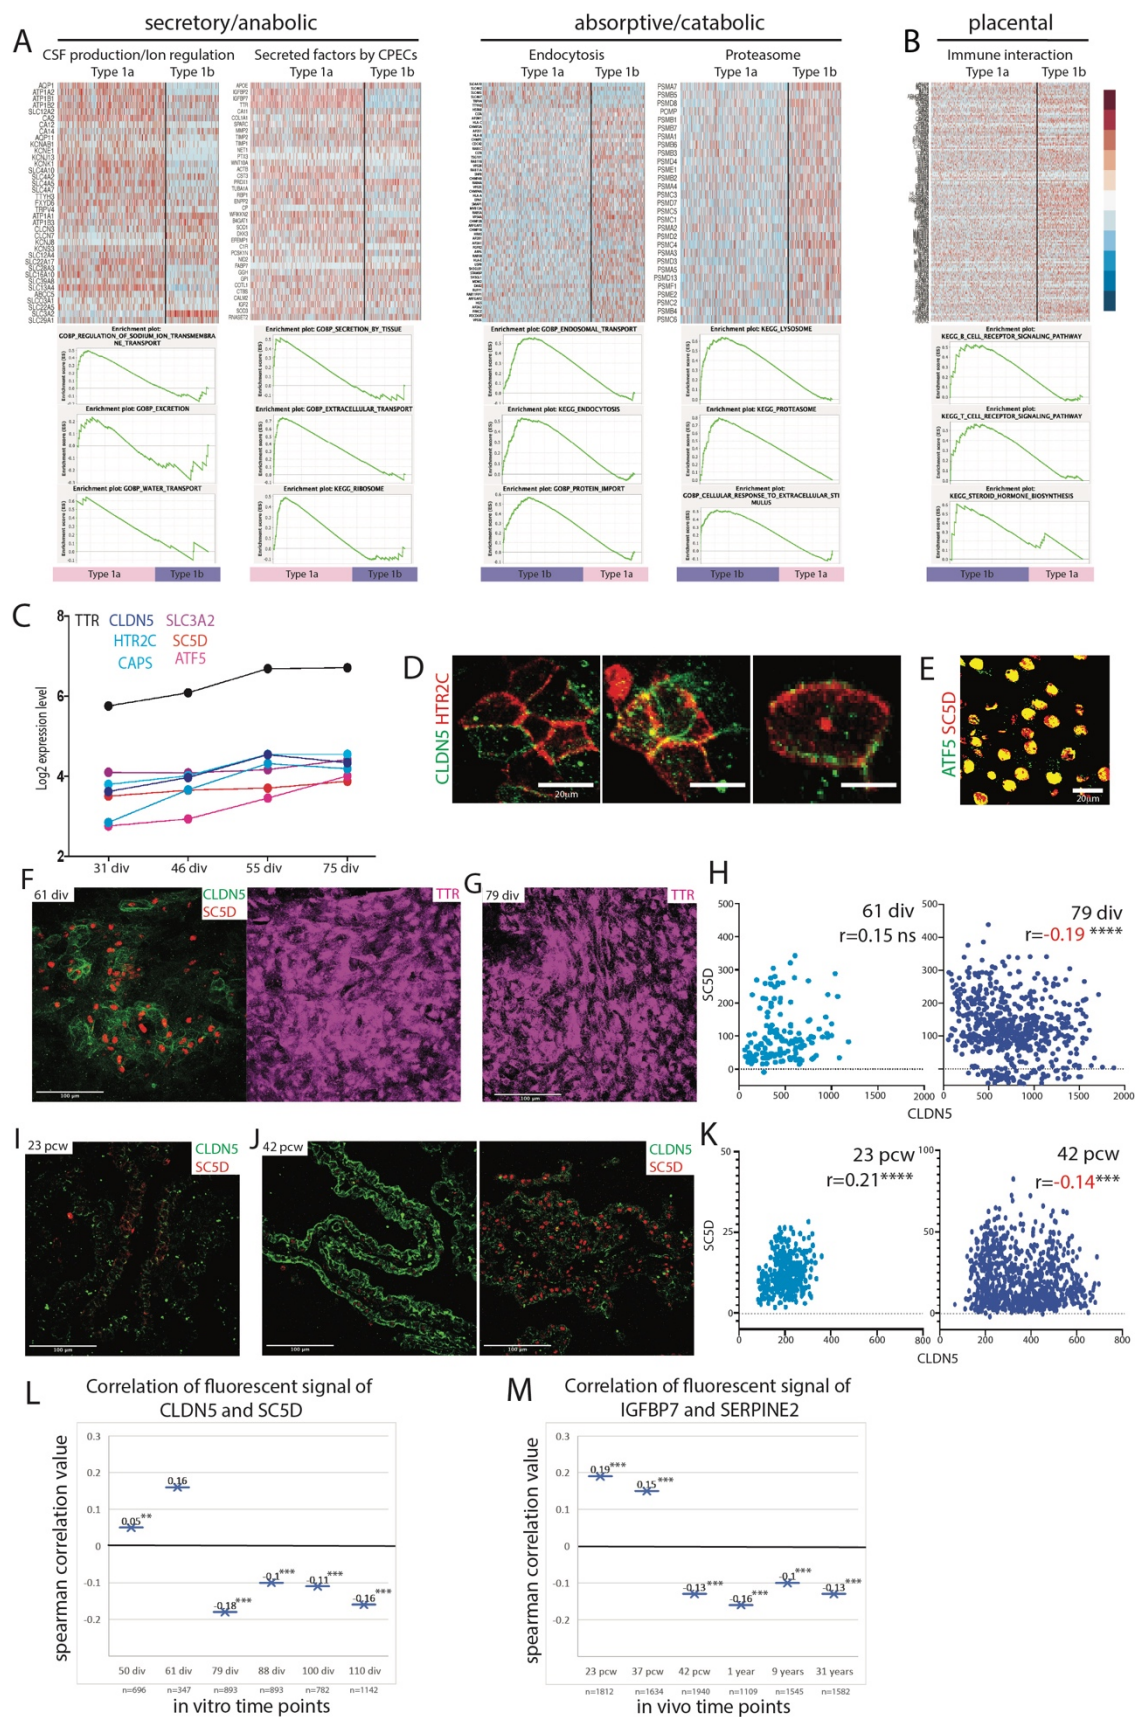

**Supplementary Figure 9: Additional studies on late type 1a and type 1b dCPECs. (A)**

Secretory/anabolic (left) and absorptive/catabolic pathways (right) enriched in C1a and C1b cells, respectively. (Upper) Heatmaps of manually-curated secretory/anabolic (CSF production/ion regulation, secreted factors) and absorptive/catabolic genes (endocytosis, proteasome). (Lower) GSEA enrichment plots for secretory/anabolic (regulation of sodium ion transmembrane transport, excretion, water transport, secretion, extracellular transport, ribosome) and absorptive/catabolic pathways (endosomal transport, endocytosis, protein import, lysosome, proteasome, cellular response to extracellular stimulus). **(B)** Placental functions<sup>86</sup> enriched in C1b cells. Heatmaps and GSEA enrichment plots for immune interaction genes, B-cell receptor signaling, T-cell receptor signaling, and steroid hormone biosynthesis. Color scale of DEGs Z-score. **(C)** Expression levels in individual genes used for pairwise correlations in Fig. 7D (C1a markers: CLDN5, HTR2C, CAPS; C1b markers: SLC3A2, SC5D, ATF5). **(D)** ICC validation of CLDN5 as a C1a marker based on membrane colocalization with HTR2C, another C1a marker (75-div). **(E)** ICC validation of SC5D as a C1b marker based on nuclear colocalization with ATF5, another C1b marker (75-div). **(F-H)** C1a-C1b specification *in vitro* (CLDN5-SC5D ICC maximal projections and scatterplots with Pearson correlations; 61- and 79-div). TTR+ dCPECs at 61-div displaying positively-correlated CLDN5-SC5D expression (F); TTR positivity of the 79-div field shown in Fig. 7F-G (G); scatterplots of CLDN5-SC5D coexpression in individual dCPECs, whose correlation trends positively at 61-div, then becomes significantly negative by 79-div (H) ( $p=0.15^{ns}$ ,  $n=150$ ;  $p<0.0001^{****}$ ,  $n=584$ ). **(I-K)** C1a-C1b specification *in vivo* (CLDN5-SC5D IHC maximal projections and scatterplots with Pearson correlations; 23- and 42-pcw). Relatively low and positively-correlated CLDN5-SC5D expression at 23-pcw (I); relatively large fields of CLDN5<sup>hi</sup>-SC5D<sup>lo</sup> (C1a) and SC5D<sup>hi</sup>-CLDN5<sup>lo</sup> (C1b) cells at 42-pcw (J); scatterplots of CLDN5-SC5D coexpression in CPECs *in vivo*, whose correlation is significantly positive at 23-pcw, then becomes significantly negative by 42-pcw ( $p<0.0001^{****}$ ,  $n=323$ ;  $p<0.001^{***}$ ,  $n=812$ ). **(L)** Expanded *in vitro* series (50-110-div) of CLDN5-SC5D Spearman correlations highlighting C1a-C1b differentiation between 61- and 79-div. **(M)** Expanded *in vivo* series

(23-pcw-31-years) of Spearman correlations using independent cytoplasmic markers for C1a (IGFBP7) and C1b (SERPINE2) highlighting C1a-C1b differentiation near term. Source data provided as a Source Data file. See statistical section of Methods for details.
